# Supplementary material
Source: PubMed Central journal article supplement (PMC524832)
Supplement: pnas_101_44_15561__6.pdf [file pnas_101_44_15561__6.pdf]

| Table 6. PLA result for AP-1 Complex: APL2;APL4;APM1;APS1; |           |                                                                                                                                                                                    |        |        |        |        |       |       |       |       |       |       |  |
|------------------------------------------------------------|-----------|------------------------------------------------------------------------------------------------------------------------------------------------------------------------------------|--------|--------|--------|--------|-------|-------|-------|-------|-------|-------|--|
| Gene Name                                                  | PLA Score | Gene Information                                                                                                                                                                   |        |        |        |        |       |       |       |       |       |       |  |
| <b>ENT4</b>                                                | 0.806     | Protein of unknown function, contains an N-terminal epsin-like domain                                                                                                              |        |        |        |        |       |       |       |       |       |       |  |
| EFT2                                                       | 0.792     | translation elongation factor 2 (EF-2)                                                                                                                                             |        |        |        |        |       |       |       |       |       |       |  |
| ADE16                                                      | 0.783     | 5-aminoimidazole-4-carboxamide ribonucleotide (AICAR) transformylase/IMP cyclohydrolase                                                                                            |        |        |        |        |       |       |       |       |       |       |  |
| YLR047C                                                    | 0.782     |                                                                                                                                                                                    |        |        |        |        |       |       |       |       |       |       |  |
| YAR062W                                                    | 0.777     |                                                                                                                                                                                    |        |        |        |        |       |       |       |       |       |       |  |
| <b>BUD7</b>                                                | 0.776     | Protein involved in bud-site selection; diploid mutants display an axial-like budding pattern                                                                                      |        |        |        |        |       |       |       |       |       |       |  |
| RTG1                                                       | 0.775     | transcription factor                                                                                                                                                               |        |        |        |        |       |       |       |       |       |       |  |
| YBR220C                                                    | 0.773     |                                                                                                                                                                                    |        |        |        |        |       |       |       |       |       |       |  |
| <b>SEC61</b>                                               | 0.767     | membrane component of ER protein translocation apparatus                                                                                                                           |        |        |        |        |       |       |       |       |       |       |  |
| SIP5                                                       | 0.764     | Sip5 facilitates the interaction between the Reg1Glc7 phosphatase and the Snf1 kinase.                                                                                             |        |        |        |        |       |       |       |       |       |       |  |
| YEL045C                                                    | 0.760     |                                                                                                                                                                                    |        |        |        |        |       |       |       |       |       |       |  |
| YAL004W                                                    | 0.760     |                                                                                                                                                                                    |        |        |        |        |       |       |       |       |       |       |  |
| YDR491C                                                    | 0.758     |                                                                                                                                                                                    |        |        |        |        |       |       |       |       |       |       |  |
| WHI3                                                       | 0.749     | RNA binding protein (putative)                                                                                                                                                     |        |        |        |        |       |       |       |       |       |       |  |
| UTH1                                                       | 0.748     | Youth, involved in determining yeast longevity                                                                                                                                     |        |        |        |        |       |       |       |       |       |       |  |
| SIN4                                                       | 0.745     | RNA polymerase II holoenzyme/mediator subunit                                                                                                                                      |        |        |        |        |       |       |       |       |       |       |  |
| PGK1                                                       | 0.741     | 3-phosphoglycerate kinase                                                                                                                                                          |        |        |        |        |       |       |       |       |       |       |  |
| YFR018C                                                    | 0.741     |                                                                                                                                                                                    |        |        |        |        |       |       |       |       |       |       |  |
| AGP1                                                       | 0.737     | amino acid permease                                                                                                                                                                |        |        |        |        |       |       |       |       |       |       |  |
| HMG1                                                       | 0.737     | 3-hydroxy-3-methylglutaryl-coenzyme A (HMG-CoA) reductase isozyme                                                                                                                  |        |        |        |        |       |       |       |       |       |       |  |
| YOR114W                                                    | -0.833    | -                                                                                                                                                                                  |        |        |        |        |       |       |       |       |       |       |  |
| YMR003W                                                    | -0.812    | -                                                                                                                                                                                  |        |        |        |        |       |       |       |       |       |       |  |
| YKR022C                                                    | -0.793    | Protein required for cell viability                                                                                                                                                |        |        |        |        |       |       |       |       |       |       |  |
| YVC1                                                       | -0.788    | vacuolar cation channel                                                                                                                                                            |        |        |        |        |       |       |       |       |       |       |  |
| <b>APL2</b>                                                | -0.785    | beta-adaptin/clathrin associated protein complex large subunit                                                                                                                     |        |        |        |        |       |       |       |       |       |       |  |
| CCT8                                                       | -0.783    | chaperonin containing T-complex subunit eight component                                                                                                                            |        |        |        |        |       |       |       |       |       |       |  |
| MRPS17                                                     | -0.781    | Mitochondrial ribosomal protein of the small subunit                                                                                                                               |        |        |        |        |       |       |       |       |       |       |  |
| YBR071W                                                    | -0.781    | -                                                                                                                                                                                  |        |        |        |        |       |       |       |       |       |       |  |
| FAR8                                                       | -0.774    | Protein involved in G1 cell cycle arrest in response to pheromone, in a pathway different from the Far1p-dependent pathway; interacts with Far3p, Far7p, Far9p, Far10p, and Far11p |        |        |        |        |       |       |       |       |       |       |  |
| HCM1                                                       | -0.773    | forkhead protein                                                                                                                                                                   |        |        |        |        |       |       |       |       |       |       |  |
| MGE1                                                       | -0.769    | GrpE homolog                                                                                                                                                                       |        |        |        |        |       |       |       |       |       |       |  |
| <b>CHS5</b>                                                | -0.768    | Involved in chitin synthase III activity, also required for homozygosis in the first stages of mating                                                                              |        |        |        |        |       |       |       |       |       |       |  |
| MSS2                                                       | -0.759    | cox2 pre-mRNA splicing factor                                                                                                                                                      |        |        |        |        |       |       |       |       |       |       |  |
| <b>END3</b>                                                | -0.758    | EH domain-containing protein involved in endocytosis, actin cytoskeletal organization and cell wall morphogenesis; forms a complex with Sla1p and Pan1p                            |        |        |        |        |       |       |       |       |       |       |  |
| YPL267W                                                    | -0.756    | Protein of unknown function, potential Cdc28p substrate                                                                                                                            |        |        |        |        |       |       |       |       |       |       |  |
| <b>SRP54</b>                                               | -0.756    | Signal recognition particle subunit (homolog of mammalian SRP54)                                                                                                                   |        |        |        |        |       |       |       |       |       |       |  |
| MRPL22                                                     | -0.753    | Mitochondrial ribosomal protein of the large subunit                                                                                                                               |        |        |        |        |       |       |       |       |       |       |  |
| <b>SSO1</b>                                                | -0.753    | t-SNARE                                                                                                                                                                            |        |        |        |        |       |       |       |       |       |       |  |
| RPN9                                                       | -0.750    | proteasome regulatory particle subunit                                                                                                                                             |        |        |        |        |       |       |       |       |       |       |  |
| YBL060W                                                    | -0.749    | -                                                                                                                                                                                  |        |        |        |        |       |       |       |       |       |       |  |
| Permutation Test                                           |           |                                                                                                                                                                                    |        |        |        |        |       |       |       |       |       |       |  |
| Percent                                                    | 0.1       | 0.5                                                                                                                                                                                | 1      | 2.5    | 5      | 10     | 90    | 95    | 97.5  | 99    | 99.5  | 99.9  |  |
| threshold                                                  | -0.510    | -0.467                                                                                                                                                                             | -0.433 | -0.391 | -0.354 | -0.313 | 0.311 | 0.351 | 0.387 | 0.427 | 0.459 | 0.513 |  |
