# Supplementary material
Source: PubMed Central journal article supplement (PMC524832)
Supplement: pnas_101_44_15561__8.pdf [file pnas_101_44_15561__8.pdf]

Table 8. Correlation between X= marker profile for MTR3 and Y= any gene profile

| Gene Y      | CORR   | Gene Information                                                                                                                                                    |
|-------------|--------|---------------------------------------------------------------------------------------------------------------------------------------------------------------------|
| YOR300W     | 0.616  | Up in Starvation                                                                                                                                                    |
| PBP1        | 0.509  | Poly(A)-binding protein binding protein                                                                                                                             |
| YOR081C     | 0.498  | Protein of unknown function, localizes to lipid particles; potential Cdc28p substrate                                                                               |
| ACH1        | 0.480  | acetyl CoA hydrolase                                                                                                                                                |
| SSA4        | 0.464  | HSP70 family                                                                                                                                                        |
| CIT1        | 0.463  | citrate synthase                                                                                                                                                    |
| HSP26       | 0.462  | heat shock protein 26                                                                                                                                               |
| GSY2        | 0.450  | glycogen synthase (UDP-glucose-starch glucosyltransferase)                                                                                                          |
| CIN5        | 0.448  | bZIP (basic-leucine zipper) protein can activate transcription from a promoter containing a Yap recognition site                                                    |
| YPL230W     | 0.445  | Up in Starvation                                                                                                                                                    |
| HAP4        | 0.444  | transcriptional activator protein of CYC1 (component of HAP2/HAP3 heteromer)                                                                                        |
| YPR152C     | 0.440  | -                                                                                                                                                                   |
| SOD2        | 0.437  | Mn-containing superoxide dismutase                                                                                                                                  |
| CDC15       | 0.429  | protein kinase domain                                                                                                                                               |
| YPL014W     | 0.423  | -                                                                                                                                                                   |
| MSN4        | 0.422  | zinc finger protein                                                                                                                                                 |
| YDL197C     | 0.418  | -                                                                                                                                                                   |
| RPI1        | 0.413  | ras inhibitor                                                                                                                                                       |
| YMR279C     | 0.413  | -                                                                                                                                                                   |
| ECM30       | 0.407  | Non-essential protein of unknown function                                                                                                                           |
| BIO2        | -0.530 | biotin synthase                                                                                                                                                     |
| PHO81       | -0.488 | Positive regulatory protein of phosphate pathway                                                                                                                    |
| <b>MTR3</b> | -0.481 | Involved in mRNA transport                                                                                                                                          |
| YGR154C     | -0.475 | -                                                                                                                                                                   |
| PDH1        | -0.451 | prpD homologue; (62% identical to the prpD genes of Escherichia coli and Salmonella typhimurium, which play an unknown but essential role in propionate catabolism) |
| YLR334C     | -0.449 | -                                                                                                                                                                   |
| STB6        | -0.412 | binds Sin3p in two-hybrid assay                                                                                                                                     |
| VPS33       | -0.409 | vacuolar sorting protein essential for vacuolar morphogenesis and function                                                                                          |
| MET8        | -0.396 | Bifunctional dehydrogenase and ferredoxinase, involved in the biosynthesis of siroheme; also involved in the expression of PAPS reductase and sulfite reductase     |
| YDR415C     | -0.388 | -                                                                                                                                                                   |
| CHS7        | -0.385 | The seventh gene identified that is involved in chitin synthesis; involved in Chs3p export from the ER                                                              |
| YOL166C     | -0.382 | -                                                                                                                                                                   |
| YOL164W     | -0.381 | -                                                                                                                                                                   |
| YGL050W     | -0.381 | -                                                                                                                                                                   |
| YAL035C-A   | -0.380 | -                                                                                                                                                                   |
| MFA1        | -0.376 | a-factor mating pheromone precursor                                                                                                                                 |
| YDL114W     | -0.376 | -                                                                                                                                                                   |
| YNL170W     | -0.372 | Sporulation                                                                                                                                                         |
| YBR190W     | -0.371 | Protein required for cell viability                                                                                                                                 |
| PTC1        | -0.369 | serine-threonine protein phosphatase                                                                                                                                |
