# Supplementary material
Source: PubMed Central journal article supplement (PMC524832)
Supplement: pnas_101_44_15561__9.pdf [file pnas_101_44_15561__9.pdf]

Table 9. PLA result for TP53, TP53INP1, TPBP1, TPBP2

| Gene Name        | LA Score | Gene Information                                                                                                            |        |        |        |        |       |       |       |       |       |       |
|------------------|----------|-----------------------------------------------------------------------------------------------------------------------------|--------|--------|--------|--------|-------|-------|-------|-------|-------|-------|
| TBL3             | 0.697    | transducin (beta)-like 3 [3':AA021146,5':AA021145]                                                                          |        |        |        |        |       |       |       |       |       |       |
| CCNL1            | 0.685    | cyclin L 1 [3':AA016305,5':AA017675]                                                                                        |        |        |        |        |       |       |       |       |       |       |
| SEPW1            | 0.658    | selenoprotein W, 1 [3':AA046261,5':AA046220]                                                                                |        |        |        |        |       |       |       |       |       |       |
| AP1GBP1          | 0.657    | AP1 gamma subunit binding protein 1 [3':H18954,5':H19398*]                                                                  |        |        |        |        |       |       |       |       |       |       |
| NA-2444          | 0.653    | ESTs [3':H40688*,5':NA]                                                                                                     |        |        |        |        |       |       |       |       |       |       |
| NA-1189          | 0.638    | ESTs [3':R60021,5':R60081]                                                                                                  |        |        |        |        |       |       |       |       |       |       |
| HDLBP            | 0.638    | high density lipoprotein binding protein (vigilin) [3':AA057676,5':AA057691]                                                |        |        |        |        |       |       |       |       |       |       |
| SEC14L2          | 0.637    | SEC14-like 2 (S. cerevisiae) [3':AA028050,5':AA028049]                                                                      |        |        |        |        |       |       |       |       |       |       |
| GNAT1            | 0.634    | guanine nucleotide binding protein (G protein), alpha transducing activity polypeptide 1 [3':AA056970,5':AA057020]          |        |        |        |        |       |       |       |       |       |       |
| NA-391           | 0.631    | NA [3':T72633*,5':T72702]                                                                                                   |        |        |        |        |       |       |       |       |       |       |
| PRKCQ            | 0.631    | protein kinase C, theta [3':R16896,5':R16950*]                                                                              |        |        |        |        |       |       |       |       |       |       |
| A2M              | 0.620    | alpha-2-macroglobulin [3':T59946,5':T60017*]                                                                                |        |        |        |        |       |       |       |       |       |       |
| NA-3866          | 0.618    | Homo sapiens, clone MGC:10120 IMAGE:3900723, mRNA, complete cds [3':N48606,5':N47289]                                       |        |        |        |        |       |       |       |       |       |       |
| SIAT1            | 0.618    | sialyltransferase 1 (beta-galactoside alpha-2,6-sialyltransferase) [3':T87101,5':T87100]                                    |        |        |        |        |       |       |       |       |       |       |
| ZNF278           | 0.616    | zinc finger protein 278 [3':AA020865,5':AA020915]                                                                           |        |        |        |        |       |       |       |       |       |       |
| HIRIP3           | 0.616    | HIRA interacting protein 3 [3':H09174,5':H09232]                                                                            |        |        |        |        |       |       |       |       |       |       |
| KIAA0774         | 0.614    | KIAA0774 protein [3':H04808,5':H04911]                                                                                      |        |        |        |        |       |       |       |       |       |       |
| PMS2L2           | 0.614    | postmeiotic segregation increased 2-like 2 [3':H25510,5':H25509*]                                                           |        |        |        |        |       |       |       |       |       |       |
| NA-2884          | 0.613    | ESTs [3':H92021,5':H92020*]                                                                                                 |        |        |        |        |       |       |       |       |       |       |
| HNRPA2B1         | 0.613    | heterogeneous nuclear ribonucleoprotein A2/B1 [3':AA036731,5':AA036938]                                                     |        |        |        |        |       |       |       |       |       |       |
| LPIN2            | -0.687   | lipin 2 [3':AA031651*,5':AA031742]                                                                                          |        |        |        |        |       |       |       |       |       |       |
| <b>CAV1</b>      | -0.674   | caveolin 1, caveolae protein, 22 kDa [3':AA047243,5':AA047106]                                                              |        |        |        |        |       |       |       |       |       |       |
| <b>NRG1</b>      | -0.670   | neuregulin 1 [3':H24357,5':H25173]                                                                                          |        |        |        |        |       |       |       |       |       |       |
| <b>SMARCA4</b>   | -0.658   | SWI/SNF related, matrix associated, actin dependent regulator of chromatin, subfamily a, member 4 [3':AA054955,5':AA055417] |        |        |        |        |       |       |       |       |       |       |
| NA-1487          | -0.649   | ESTs [3':R81328,5':R81579]                                                                                                  |        |        |        |        |       |       |       |       |       |       |
| <b>PDCD2</b>     | -0.641   | programmed cell death 2 [3':W73377*,5':W73438]                                                                              |        |        |        |        |       |       |       |       |       |       |
| NA-3802          | -0.639   | ESTs [3':N63566,5':N94730]                                                                                                  |        |        |        |        |       |       |       |       |       |       |
| INSL4            | -0.638   | insulin-like 4 (placenta) [3':H59825,5':H60640*]                                                                            |        |        |        |        |       |       |       |       |       |       |
| ALS2CR9          | -0.636   | reserved [3':W74616,5':W94188]                                                                                              |        |        |        |        |       |       |       |       |       |       |
| FOSL1            | -0.635   | FOS-like antigen 1 [3':T89996,5':T82817]                                                                                    |        |        |        |        |       |       |       |       |       |       |
| NA-8094          | -0.630   | ESTs, Weakly similar to T08599 probable transcription factor CA150 - human [H. sapiens] [3':AA035263*,5':AA035262]          |        |        |        |        |       |       |       |       |       |       |
| EVA1             | -0.625   | epithelial V-like antigen 1 [3':N70439*,5':NA]                                                                              |        |        |        |        |       |       |       |       |       |       |
| SNTB2            | -0.621   | syntrophin, beta 2 (dystrophin-associated protein A1, 59 kDa, basic component 2) [3':AA035253,5':AA035252]                  |        |        |        |        |       |       |       |       |       |       |
| <b>CITED2</b>    | -0.621   | Cbp/p300-interacting transactivator, with Glu/Asp-rich carboxy-terminal domain, 2 [3':AA040200,5':AA040844]                 |        |        |        |        |       |       |       |       |       |       |
| VRP              | -0.616   | vascular Rab-GAP/TBC-containing [3':W69438,5':W69521]                                                                       |        |        |        |        |       |       |       |       |       |       |
| LOC51035         | -0.611   | ORF [3':AA010706,5':AA010705]                                                                                               |        |        |        |        |       |       |       |       |       |       |
| CXX1             | -0.609   | CAAX box 1 [3':W95708*,5':W95707]                                                                                           |        |        |        |        |       |       |       |       |       |       |
| FLJ10830         | -0.607   | hypothetical protein FLJ10830 [3':AA031267*,5':AA031392]                                                                    |        |        |        |        |       |       |       |       |       |       |
| PDE1A            | -0.597   | phosphodiesterase 1A, calmodulin-dependent [3':AA037493,5':AA037435]                                                        |        |        |        |        |       |       |       |       |       |       |
| <b>CAV1</b>      | -0.594   | caveolin 1, caveolae protein, 22 kDa [3':AA054588,5':AA054776]                                                              |        |        |        |        |       |       |       |       |       |       |
| Permutation Test |          |                                                                                                                             |        |        |        |        |       |       |       |       |       |       |
| Percent          | 0.100    | 0.5                                                                                                                         | 1      | 2.5    | 5      | 10     | 90    | 95    | 97.5  | 99    | 99.5  | 99.9  |
| threshold        | -0.570   | -0.506                                                                                                                      | -0.473 | -0.433 | -0.396 | -0.356 | 0.355 | 0.394 | 0.436 | 0.468 | 0.503 | 0.580 |
