# Supplementary material
Source: PubMed Central journal article supplement (PMC524832)
Supplement: pnas_101_44_15561__14.pdf [file pnas_101_44_15561__14.pdf]

Table 14. LA for X=APOE, Y=APOC1

|               | APOC1    |                                                                                                                          |
|---------------|----------|--------------------------------------------------------------------------------------------------------------------------|
|               |          | apolipoprotein C-I [3':W79394,5':W79313]                                                                                 |
| APOE          | 0.254    | apolipoprotein E [3':H69038*,5':NA]                                                                                      |
| APOE          | 0.138    | apolipoprotein E [3':T70891,5':T70943]                                                                                   |
| Gene Name     | LA Score | Gene Information                                                                                                         |
| MAX           | 0.443    | MAX protein [3':R42275,5':R18329*]                                                                                       |
| TAZ           | 0.434    | tafazzin (cardiomyopathy, dilated 3A (X-linked); endocardial fibroelastosis 2; Barth syndrome) [3':AA047410,5':AA047530] |
| CFP1          | 0.418    | cyclin fold protein 1 [3':AA029847,5':AA029982]                                                                          |
| MEP50         | 0.411    | MEP50 protein [3':AA009841,5':AA009867]                                                                                  |
| <b>FE65L2</b> | 0.409    | FE65-like protein 2 [3':N57526*,5':NA]                                                                                   |
| MAX           | 0.406    | MAX protein [3':AA053315,5':AA058611]                                                                                    |
| EIF5          | 0.402    | eukaryotic translation initiation factor 5 [3':N52909*,5':NA]                                                            |
| ISL1          | 0.402    | ISL1 transcription factor, LIM/homeodomain, (islet-1) [3':AA057381,5':AA057085]                                          |
| NA-1383       | 0.396    | ESTs [3':R69252*,5':R69134]                                                                                              |
| YME1L1        | 0.395    | YME1-like 1 ( <i>S. cerevisiae</i> ) [3':AA015852*,5':AA015851]                                                          |
| FBXO18        | 0.390    | likely ortholog of mouse f-box only protein 18 [3':W86598,5':W86597]                                                     |
| LETM1         | 0.390    | leucine zipper-EF-hand containing transmembrane protein 1 [3':H66045,5':H66090]                                          |
| MGC1127       | 0.388    | hypothetical gene MGC1127 [3':N34395*,5':NA]                                                                             |
| WAC           | 0.388    | WW domain-containing adapter with a coiled-coil region [3':W02723,5':W24754]                                             |
| MGC12760      | 0.377    | hypothetical protein MGC12760 [3':R51972*,5':NA]                                                                         |
| MGC12760      | 0.375    | hypothetical protein MGC12760 [3':H88892,5':H88891]                                                                      |
| NUDT2         | 0.374    | nudix (nucleoside diphosphate linked moiety X)-type motif 2 [3':N80046*,5':NA]                                           |
| HLA-DRB3      | 0.374    | major histocompatibility complex, class II, DR beta 3 [3':N95080,5':W23482]                                              |
| HRMT1L1       | 0.374    | HMT1 hnRNP methyltransferase-like 1 ( <i>S. cerevisiae</i> ) [3':AA010040*,5':NA]                                        |
| NA-441        | 0.374    | Homo sapiens cDNA FLJ25893 fis, clone CBR03492 [3':T91078*,5':T85940]                                                    |
| HCMOGT-1      | -0.495   | sperm antigen HCMOGT-1 [3':R02582,5':R02701]                                                                             |
| TBK1          | -0.487   | TANK-binding kinase 1 [3':W72180*,5':NA]                                                                                 |
| COL1A1        | -0.448   | collagen, type I, alpha 1 [3':W90360,5':W90359]                                                                          |
| PAK4          | -0.448   | p21(CDKN1A)-activated kinase 4 [3':R11631,5':R09837]                                                                     |
| BMP6          | -0.434   | bone morphogenetic protein 6 [3':R27799,5':R27892]                                                                       |
| NA-2210       | -0.427   | NA [3':H19507*,5':H19592]                                                                                                |
| PSMB5         | -0.413   | proteasome (prosome, macropain) subunit, beta type, 5 [3':N46855*,5':N47173]                                             |
| KIAA0073      | -0.406   | KIAA0073 protein [3':AA029328,5':AA029327*]                                                                              |
| CR1           | -0.405   | complement component (3b/4b) receptor 1, including Knops blood group system [3':H75766,5':H75902]                        |
| LOC64174      | -0.404   | putative dipeptidase [3':R41610*,5':R18648]                                                                              |
| PSG1          | -0.403   | pregnancy specific beta-1-glycoprotein 1 [3':N30553*,5':NA]                                                              |
| BHLHB2        | -0.401   | basic helix-loop-helix domain containing, class B, 2 [3':AA026120,5':AA026204]                                           |
| COL4A1        | -0.401   | collagen, type IV, alpha 1 [3':R78226,5':R78225]                                                                         |
| HFL3          | -0.399   | H factor (complement)-like 3 [3':H62542*,5':H62610]                                                                      |
| ADAM9         | -0.397   | a disintegrin and metalloproteinase domain 9 (meltrin gamma) [3':W47533,5':W47561]                                       |
| GRIA4         | -0.394   | glutamate receptor, ionotropic, AMPA 4 [3':R15749,5':R16185]                                                             |
| NA-3008       | -0.394   | NA [3':H80109*,5':H78866]                                                                                                |
| PSG1          | -0.392   | pregnancy specific beta-1-glycoprotein 1 [3':H02270,5':H02368]                                                           |
| NA-3587       | -0.390   | ESTs [3':N26059,5':N40423]                                                                                               |
| UCHL1         | -0.388   | ubiquitin carboxyl-terminal esterase L1 (ubiquitin thiolesterase) [3':W81058*,5':W81022]                                 |
